# Supplementary material
Source: PubMed Central journal article supplement (PMC4109544)
Supplement: JCI75073sd.pdf [file JCI75073sd.pdf]

## Supplemental Material

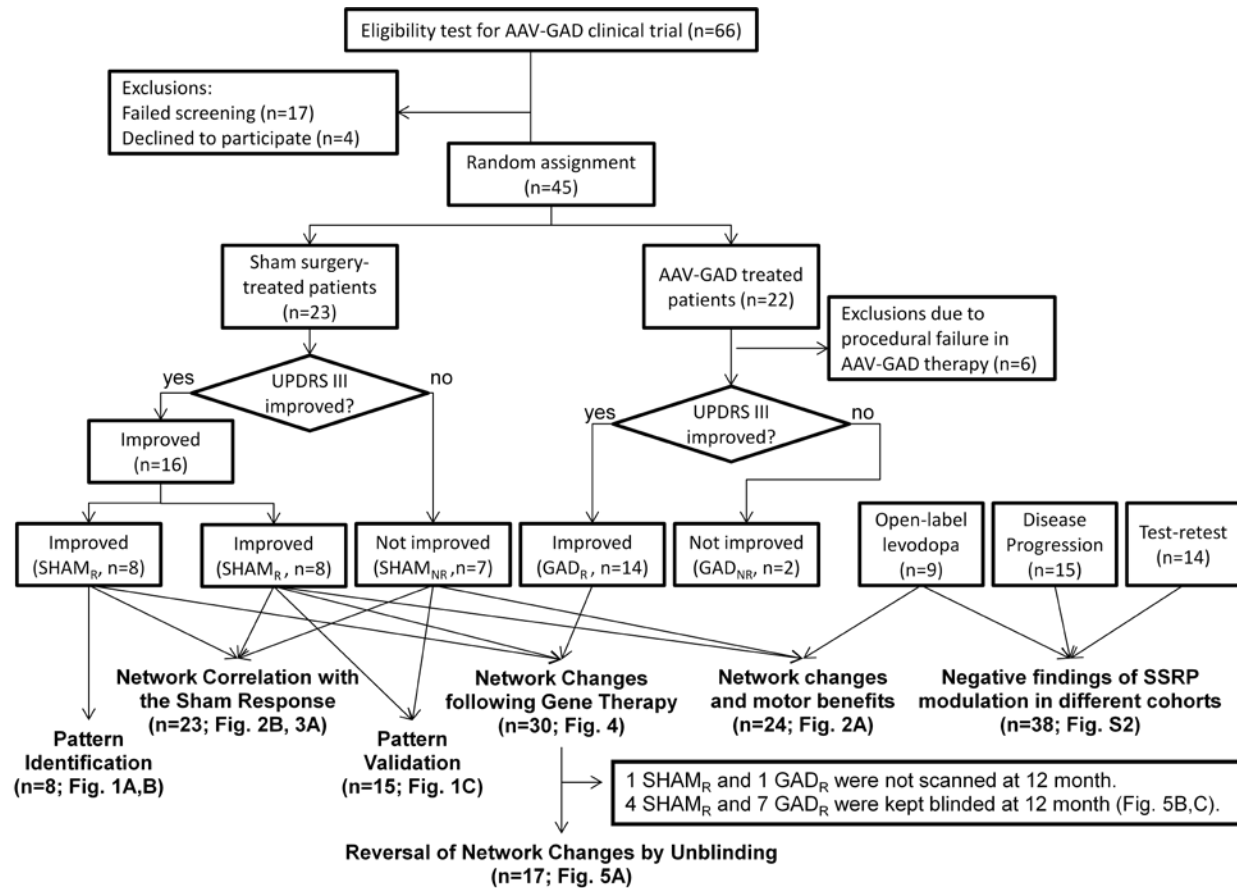

## Supplemental Figure 1. Study design.

Sixty six subjects with advanced Parkinson's disease (PD) were screened, of which 45 were enrolled in a double-blind Phase II study of adeno-associated viral vector-glutamic acid decarboxylase (AAV-GAD) gene therapy for medication refractory motor symptoms (1). Of these, 23 subjects were randomized to sham surgery group (bilateral burr hole placement) and 22 to subthalamic gene therapy. Six of the gene therapy subjects were excluded because of failed viral vector delivery (see (1) for details). Sixteen of the sham surgery (SHAM) subjects were classified as placebo "responders" based upon the presence of a reduction (improvement) in motor Unified Parkinson's Disease Rating Scale (UPDRS) ratings  $\leq -2$  points under the blind between baseline and 6 months. Fourteen of the gene therapy (GAD) subjects were also classified as "responders" under the same clinical criteria.  $^{18}\text{F}$ -fluorodeoxyglucose (FDG) PET scans acquired under the blind were selected in eight of the SHAM responders (SHAM<sub>R</sub>) and used with supervised principal component analysis (PCA) to identify a significant sham surgery-related metabolic covariance pattern (SSRP). For validation, SSRP expression was computed in the baseline and 6 month scans acquired in the remaining eight SHAM<sub>R</sub> subjects, and in the seven "sham non-responders" (SHAM<sub>NR</sub>), who exhibited either no change or deterioration in blinded UPDRS motor ratings. SSRP expression values were computed in the SHAM subjects and correlated with clinical outcomes under the blind. Blinded SSRP values from these subjects were additionally compared with corresponding measures from nine other PD subjects who were

scanned with FDG PET before and during open-label levodopa treatment titrated to produce an improvement in motor UPDRS ratings observed in the SHAM<sub>R</sub> testing group. Additional open label SSRP comparisons were performed in serial FDG PET data from PD subjects scanned two months apart in a test-retest paradigm (2) and from a longitudinal two-year natural history cohort (3). Lastly, we assessed the effects of unblinding on SSRP expression in the 12-month scans of the SHAM<sub>R</sub> and GAD<sub>R</sub> subjects.

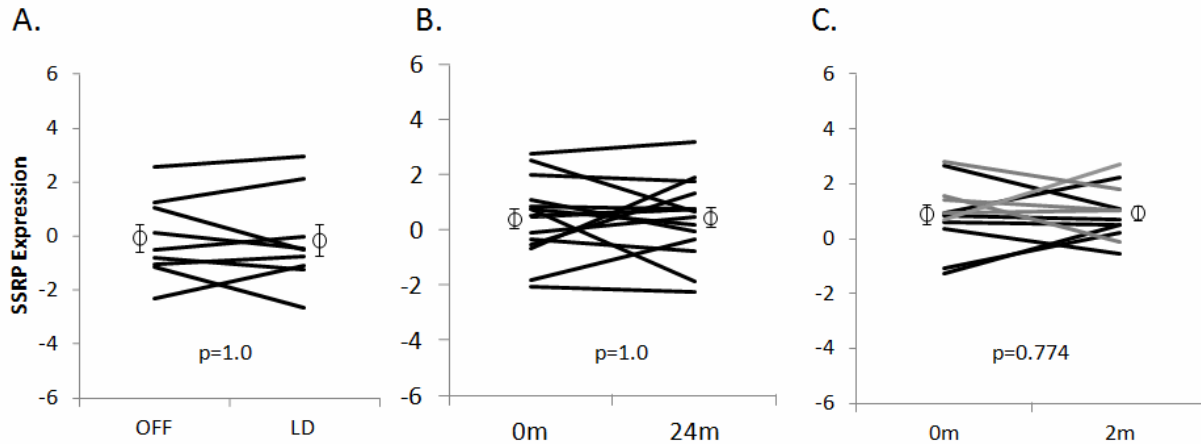

**Supplemental Figure 2. Changes in SSRP expression: Additional testing sets**

(A) No consistent trend in treatment-mediated SSRP responses was seen in nine PD subjects (4) receiving open-label levodopa (LD) infusions (4/9 violations,  $p=1.0$ ; binomial test).

(B) No change in SSRP expression was observed in 15 PD subjects (5) scanned at baseline and after 24 months of unblinded follow-up (8/15 violations,  $p=1.0$ ; binomial test).

(C) No change in SSRP expression was observed in 12 PD subjects (6) scanned at baseline and after 2 months of daily oral placebo as part of a randomized, blinded clinical trial for the treatment of cognitive symptoms of the disorder (7/12 violations,  $p=0.774$ ; binomial test).

[Symbols indicate the mean SSRP expression at each time point  $\pm 1$ SE.]

**Supplemental Table 1. Physical characteristics of the PET instruments used in the multicenter STN AAV-GAD Phase II study**

| Site     | Scanner              | Z (mm) | Slice | Reconstruction Method | Transverse Resolution (mm) | Axial Resolution (mm) | N of patients |      |
|----------|----------------------|--------|-------|-----------------------|----------------------------|-----------------------|---------------|------|
|          |                      |        |       |                       |                            |                       | GAD           | SHAM |
| <b>A</b> | GE Advance (7)       | 4.25   | 35    | 3D REPRJ              | 3.8/5.6*                   | 4.0/5.3*              | 10            | 10   |
| <b>B</b> | SIEMENS HR+ (8)      | 2.50   | 61    | 3D Iterative          | 4.4/6.2*                   | 4.1/5.9*              | 3             | 4    |
| <b>C</b> | SIEMENS HR (9)       | 3.13   | 47    | 3D FBP                | 3.6/5.5*                   | 4.0/5.4*              | 3             | 3    |
| <b>D</b> | GE Advance Nxi (10)  | 4.25   | 35    | 3D REPRJ              | 4.8/5.6                    | 6.1/6.7               | 3             | 4    |
| <b>E</b> | GE Discovery LS (10) | 4.25   | 35    | 3D FORE Iterative     | 4.8/5.6                    | 6.1/6.7               | 2             | 2    |

Resolution represents the full width at half maximum (FWHM) at the center and 10 cm from the center of the field of view (FOV).

\*Data estimated from the published values at 0 and 20 cm from the center of FOV.

**Supplemental Table 2. Clinical and neuropsychological measures in the sham surgery cohort**

|                                   | sex | age  | UPDRS (motor) |      | BDI  |      | HVLT |      | Stroop Interference |       | SDMT (written) |      | SDMT (oral) |      |
|-----------------------------------|-----|------|---------------|------|------|------|------|------|---------------------|-------|----------------|------|-------------|------|
|                                   |     |      | 0m            | 6m   | 0m   | 6m   | 0m   | 6m   | 0m                  | 6m    | 0m             | 6m   | 0m          | 6m   |
| SHAM <sub>R</sub><br>(derivation) | M   | 54   | 43            | 23   | 14   | 12   | 21   |      | 4.3                 |       | 34             | 44   | 44          | 45   |
|                                   | M   | 69   | 45            | 36   | 7    | 6    | 17   | 25   | 1.3                 | 0.5   | 42             | 50   |             | 49   |
|                                   | F   | 52   | 25            | 17   | 13   | 9    | 25   | 32   | 6.0                 | 4.3   | 54             | 51   | 64          | 67   |
|                                   | M   | 63   | 37            | 29   | 1    | 3    | 26   | 25   | -2.2                | -9.9  | 44             | 40   | 45          | 42   |
|                                   | M   | 74   | 36            | 29   | 17   | 13   | 19   | 15   | 6.2                 | 12.3  | 12             | 14   | 17          | 12   |
|                                   | F   | 61   | 29            | 23   | 16   | 9    | 14   | 14   | 5.3                 | -4.2  | 20             | 20   | 31          | 28   |
|                                   | M   | 65   | 34            | 28   | 16   | 18   | 22   | 21   | 4.1                 | 9.0   | 34             | 36   | 42          | 41   |
|                                   | M   | 58   | 56            | 54   | 8    | 6    | 19   | 21   | 2.8                 | 0.6   | 43             | 48   | 59          | 50   |
| SHAM <sub>R</sub><br>(testing)    | F   | 60   | 48            | 30   | 5    | 3    | 17   | 33   | 5.3                 | 14.0  | 37             | 40   | 49          | 53   |
|                                   | M   | 47   | 31            | 22   | 15   | 10   | 19   | 24   | 4.1                 | 5.7   | 47             | 51   | 52          | 60   |
|                                   | M   | 71   | 33            | 25   | 10   | 10   | 26   | 22   | 5.0                 | -1.0  |                | 60   | 59          |      |
|                                   | F   | 62   | 31            | 24   | 3    | 14   | 28   | 29   | 5.6                 | 11.6  | 42             | 50   | 33          | 49   |
|                                   | M   | 54   | 39            | 33   | 5    | 5    | 28   | 24   | 2.2                 | -2.5  | 57             | 56   | 56          | 58   |
|                                   | M   | 56   | 33            | 29   | 5    | 4    | 22   | 28   | 3.5                 | -10.0 | 50             | 51   | 49          | 46   |
|                                   | M   | 62   | 49            | 45   | 13   | 15   | 27   | 22   | 4.8                 | -1.7  | 39             | 41   | 51          | 38   |
|                                   | M   | 56   | 47            | 43   | 17   | 29   | 31   | 28   | 6.0                 | 5.1   | 45             | 40   | 48          | 51   |
| SHAM <sub>NR</sub>                | M   | 58   | 37            | 37   | 11   | 7    | 24   | 17   | 1.3                 | 5.0   | 39             | 31   | 52          | 47   |
|                                   | F   | 69   | 55            | 55   | 13   | 20   | 27   | 25   | 5.0                 | 2.1   | 29             | 27   | 37          | 34   |
|                                   | M   | 59   | 42            | 43   | 7    | 10   | 20   | 21   | 11.4                | 5.6   | 35             | 43   | 50          | 50   |
|                                   | M   | 75   | 48            | 52   | 16   | 26   | 11   | 14   | 0.3                 | 2.1   | 28             | 30   | 40          | 35   |
|                                   | F   | 64   | 30            | 34   | 12   | 13   | 28   | 20   | -6.1                | -5.1  | 33             | 44   | 42          | 52   |
|                                   | M   | 47   | 43            | 47   | 4    | 1    | 33   | 30   | -6.9                | 1.4   | 45             | 40   | 49          | 43   |
|                                   | M   | 52   | 35            | 45   | 5    | 8    | 22   | 23   | 14.2                | 9.2   | 50             | 53   | 57          | 61   |
| mean                              |     | 60.3 | 39.4          | 34.9 | 10.1 | 10.9 | 22.9 | 23.3 | 3.63                | 2.45  | 39.0           | 41.7 | 46.6        | 46.0 |
| SE                                |     | 1.63 | 1.77          | 2.32 | 1.06 | 1.48 | 1.14 | 1.15 | 0.96                | 1.41  | 2.28           | 2.38 | 2.28        | 2.56 |

Sham responders (SHAM<sub>R</sub>); Sham non-responders (SHAM<sub>NR</sub>); Unified Parkinson's Disease Rating Scale (UPDRS); Beck Depression Inventory (BDI); Hopkins Verbal Learning Test (HVLT); Symbol Digit Modality Test (SDMT)

**Supplemental Table 3. Demographic information****(A) Trial participants**

|                        | <b>Gene Therapy</b>      |                            | <b>Sham Surgery</b>     |                         |                       |
|------------------------|--------------------------|----------------------------|-------------------------|-------------------------|-----------------------|
|                        | Responders               | Non-responders             | Responders (derivation) | Responders (testing)    | Non-responders        |
| Gender (M:F)           | 12:2                     | 0:2                        | 6:2                     | 6:2                     | 5:2                   |
| Age                    | 60.8 ± 1.85              | 71, 66                     | 62.0 ± 2.62             | 58.5 ± 2.49             | 60.6 ± 3.64           |
| Disease Duration       | 10.1 ± 1.05              | 19, 10                     | 13.9 ± 2.29             | 9.6 ± 1.07              | 11.7 ± 1.41           |
| UPDRS motor (baseline) | 34.8 ± 1.83              | 30, 39                     | 38.1 ± 3.46             | 38.9 ± 2.82             | 41.4 ± 3.17           |
| ΔUPDRS motor (6 month) | -10.0 ± 1.28<br>(-28.7%) | +1 (+3.3%),<br>+9 (+23.1%) | -8.3 ± 1.97<br>(-21.8%) | -7.5 ± 1.76<br>(-19.3%) | 3.3 ± 1.32<br>(+8.0%) |

**(B) Validation cohorts**

|                        | <b>Test-retest</b> | <b>Disease Progression</b> |             | <b>Levodopa (open-label)</b> |
|------------------------|--------------------|----------------------------|-------------|------------------------------|
|                        |                    | T1                         | T2          |                              |
| Gender (M:F)           | 7:7                | 12:3                       |             | 7:2                          |
| Age                    | 65.0 ± 2.30        | 54.7 ± 2.98                |             | 58.8 ± 2.78                  |
| Disease Duration       | 4.8 ± 1.36         | <2                         |             | 7.1 ± 1.67                   |
| UPDRS motor (baseline) | 24.2 ± 3.39        | 9.0 ± 1.08                 | 16.5 ± 2.66 | 24.9 ± 2.79                  |
| ΔUPDRS motor (ON-OFF)  |                    |                            |             | -8.2 ± 1.16<br>(-32.9%)      |

**Supplemental References**

1. LeWitt PA, Rezai AR, Leehey MA, Ojemann SG, Flaherty AW, Eskandar EN, Kostyk SK, Thomas K, Sarkar A, Siddiqui MS, et al. AAV2-GAD gene therapy for advanced Parkinson's disease: a double-blind, sham-surgery controlled, randomised trial. *Lancet Neurol.* 2011;10(4):309-19.
2. Ma Y, Tang C, Spetsieris PG, Dhawan V, and Eidelberg D. Abnormal metabolic network activity in Parkinson's disease: test-retest reproducibility. *J Cereb Blood Flow Metab.* 2007;27(3):597-605.
3. Huang C, Tang C, Feigin A, Lesser M, Ma Y, Pourfar M, Dhawan V, and Eidelberg D. Changes in network activity with the progression of Parkinson's disease. *Brain.* 2007;130(Pt 7):1834-46.
4. Asanuma K, Tang C, Ma Y, Dhawan V, Mattis P, Edwards C, Kaplitt MG, Feigin A, and Eidelberg D. Network modulation in the treatment of Parkinson's disease. *Brain.* 2006;129(Pt 10):2667-78.
5. Tang CC, Poston KL, Dhawan V, and Eidelberg D. Abnormalities in metabolic network activity precede the onset of motor symptoms in Parkinson's disease. *J Neurosci.* 2010;30(3):1049-56.
6. Mattis PJ, Tang CC, Ma Y, Dhawan V, and Eidelberg D. Network correlates of the cognitive response to levodopa in Parkinson disease. *Neurology.* 2011;77(9):858-65.
7. DeGrado TR, Turkington TG, Williams JJ, Stearns CW, Hoffman JM, and Coleman RE. Performance characteristics of a whole-body PET scanner. *J Nucl Med.* 1994;35(8):1398-406.
8. Brix G, Zaers J, Adam LE, Bellemann ME, Ostertag H, Trojan H, Haberkorn U, Doll J, Oberdorfer F, and Lorenz WJ. Performance evaluation of a whole-body PET scanner using the NEMA protocol. National Electrical Manufacturers Association. *J Nucl Med.* 1997;38(10):1614-23.
9. Wienhard K, Dahlbom M, Eriksson L, Michel C, Bruckbauer T, Pietrzyk U, and Heiss WD. The ECAT EXACT HR: performance of a new high resolution positron scanner. *J Comput Assist Tomogr.* 1994;18(1):110-8.
10. Bolard G, Prior JO, Modolo L, Delaloye AB, Kosinski M, Wastiel C, Malterre J, Bulling S, Bochud F, and Verdun FR. Performance comparison of two commercial BGO-based PET/CT scanners using NEMA NU 2-2001. *Med Phys.* 2007;34(7):2708-17.
